# Supplementary material for: Efficient Fe3C-CF Cathode Catalyst Based on the Formation/Decomposition of Li2−xO2 for Li-O2 Batteries
Source: MDPI journal article supplement (doi:10.3390/molecules28145597), 2023-07-24
Supplement: s1 [file s1]

## Supporting Information

# Efficient Fe<sub>3</sub>C-CF cathode catalyst based on the formation/decomposition of Li<sub>2-x</sub>O<sub>2</sub> for Li-O<sub>2</sub> batteries

Guanyu Yi <sup>1,†</sup>, Gaoyang Li <sup>2,†</sup>, Shuhuai Jiang <sup>1</sup>, Guoliang Zhang <sup>2</sup>, Liang Guo <sup>2</sup>, Xiuqi Zhang <sup>2</sup>, Zhongkui Zhao <sup>1,\*</sup>  
Zhongping Zou <sup>1</sup>, Hailong Ma <sup>1</sup>, Xiaojiao Fu <sup>1</sup>, Yan Liu <sup>1</sup> and Feng Dang <sup>2,\*</sup>

<sup>1</sup> School of Materials Science and Engineering, Shandong jianzhu University, Jinan 250101, China;

<sup>2</sup> Key Laboratory for Liquid-Solid Structural Evolution and Processing of Materials (Ministry of Education), Shandong University, Jinan 250061, China;

\* Correspondence: yiguanyu@sdjzu.edu.cn (G.Y.); jorezhk@sdjzu.edu.cn (Z.Z.); dangfeng@sdu.edu.cn (F.D.)

<sup>†</sup> These authors contributed equally to this work.

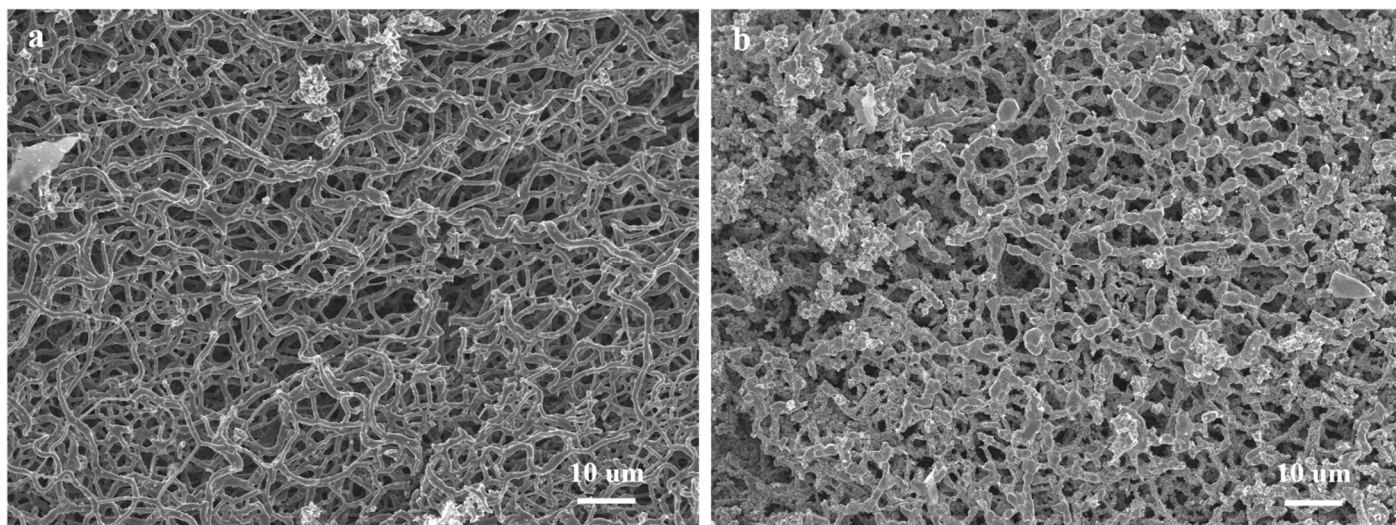

**Figure S1.** The SEM images of Fe<sub>3</sub>C-600 (a) and Fe<sub>3</sub>C-800 (b) after carbonization.

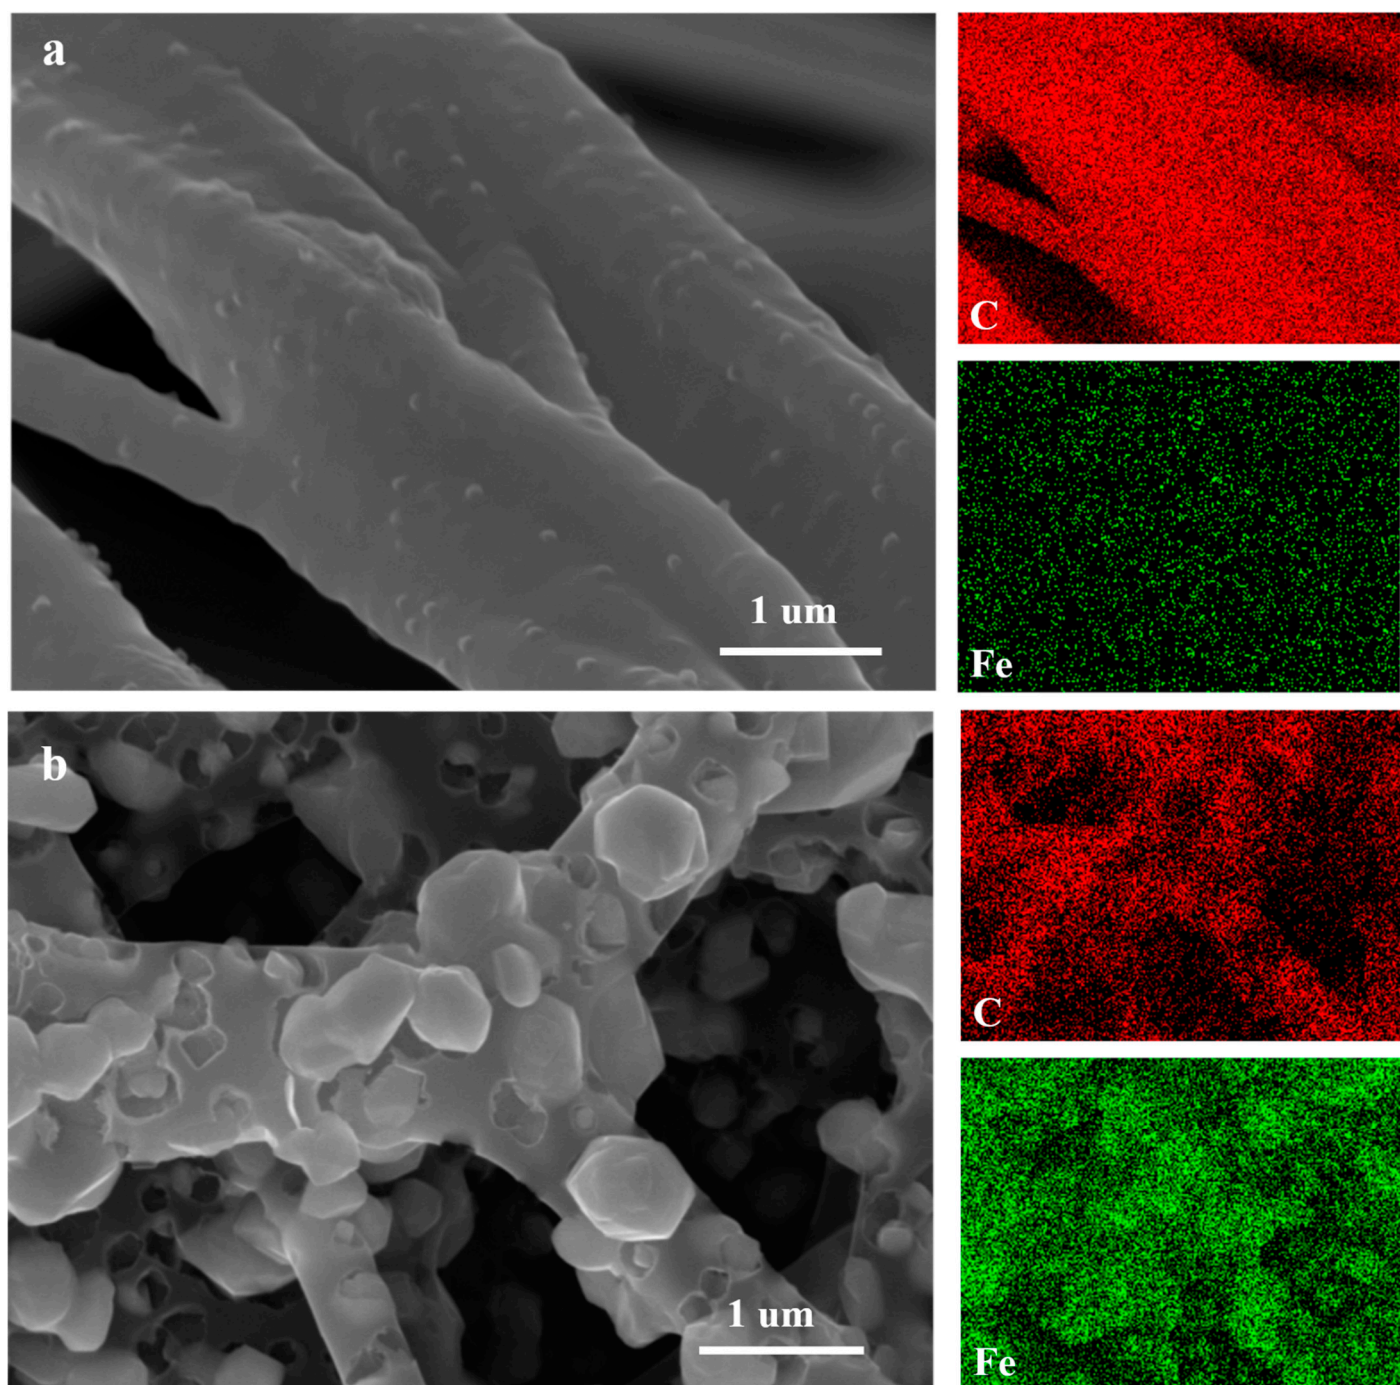

**Figure S2.** SEM images and elemental mapping of Fe and C in Fe<sub>3</sub>C-600 (a), and Fe<sub>3</sub>C-800 (b).

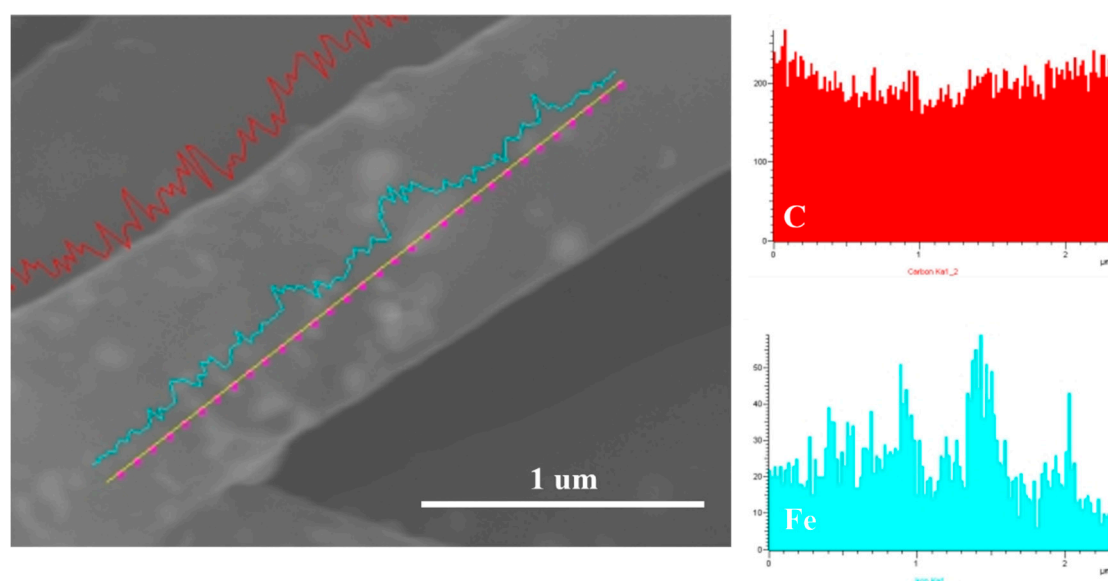

**Figure S3.** Line SEM images and elemental mapping of the Fe<sub>3</sub>C-700.

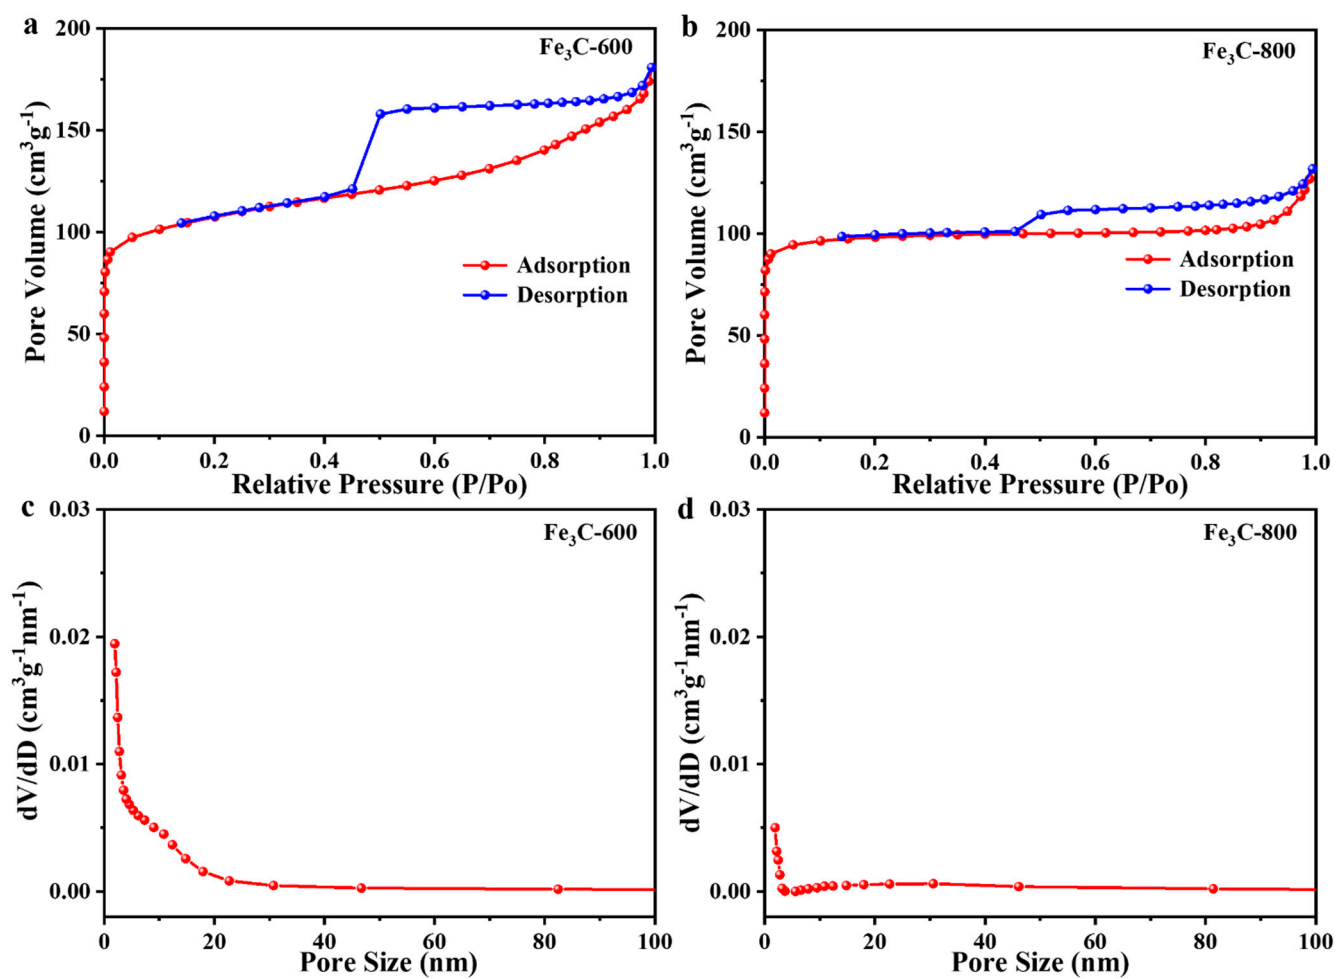

**Figure S4.** Nitrogen adsorption/desorption isotherms of Fe<sub>3</sub>C-600 (a) and Fe<sub>3</sub>C-800 (b); The pore size distribution of Fe<sub>3</sub>C-600 (c) and Fe<sub>3</sub>C-800 (d).

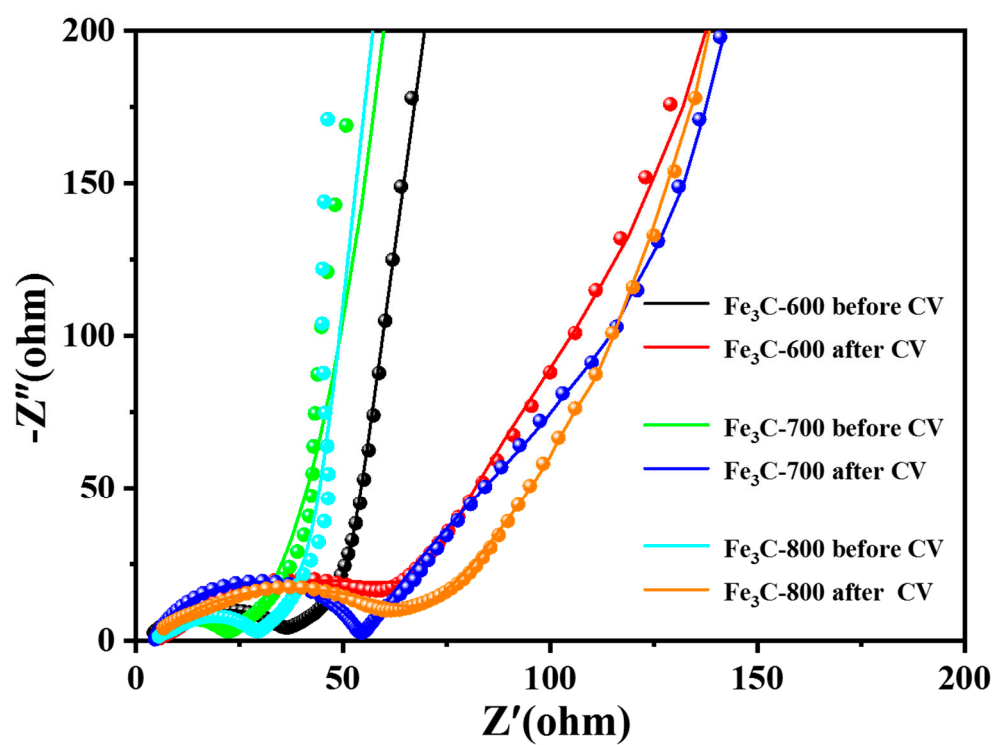

**Figure S5.** EIS spectrums of Fe<sub>3</sub>C-CF electrodes before and after CV.

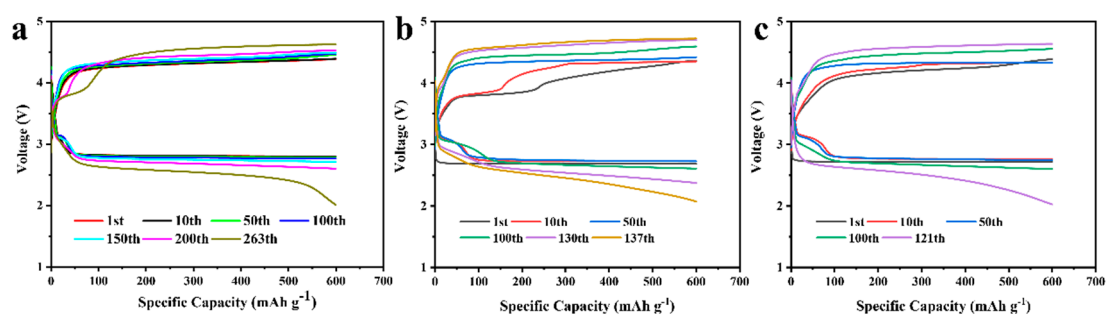

**Figure S6.** Galvanostatic discharge/charge curves of Fe<sub>3</sub>C-700 within an upper-limited specific capacity of 600 mAh g<sup>-1</sup> at a current density of 200 mA g<sup>-1</sup>(a), 800 mA g<sup>-1</sup>(b), 1000 mA g<sup>-1</sup>(c).

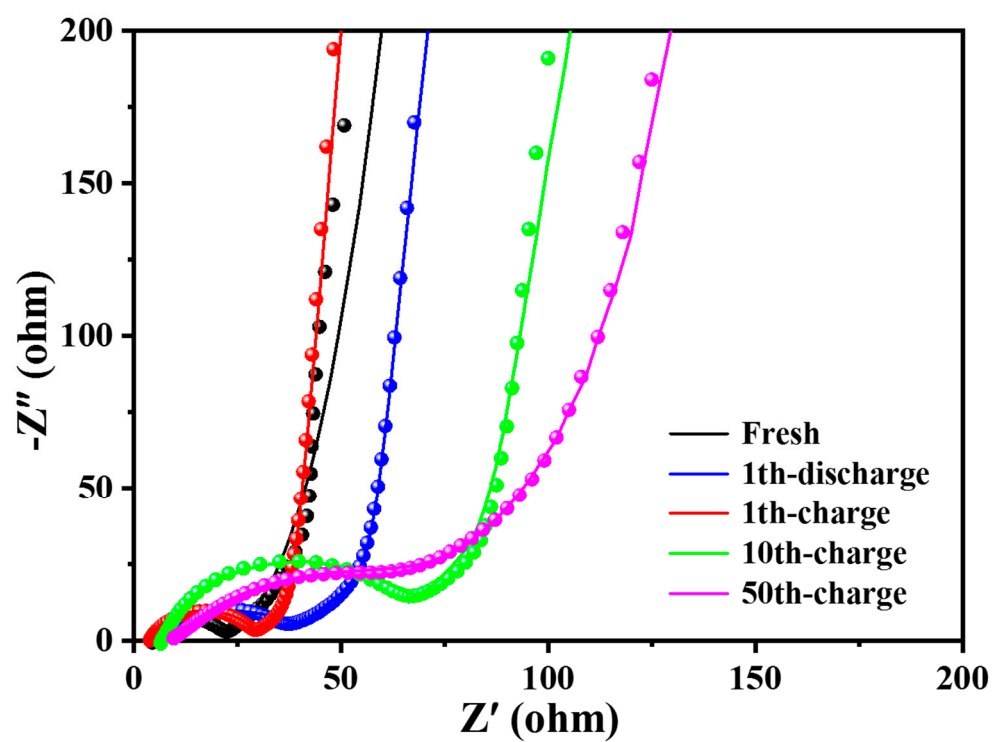

**Figure S7.** Electrochemical impedance spectra of Fe<sub>3</sub>C-700 at different stages.



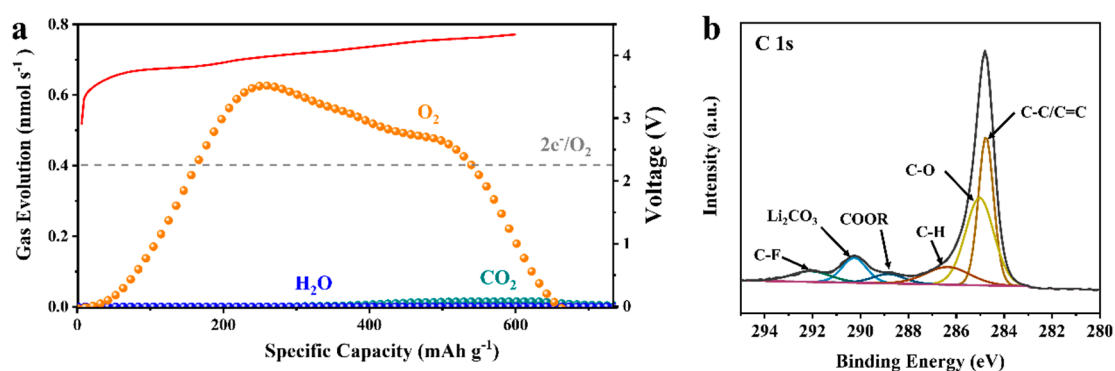

**Figure S8.** (a) In-situ DEMS curves of the Fe<sub>3</sub>C-700 catalyst, which were collected during the charging process with a specific capacity of 600 mAh g<sup>-1</sup>, at a current density of 500 mA g<sup>-1</sup>; (b) High-resolution XPS spectra of C 1s core level of the Fe<sub>3</sub>C-700 electrode after 50th recharged.

**Table S1.** Overpotentials of the ORR and OER processes of two paths on the different surfaces.


Copyright: © 2023 by the authors. Licensee MDPI, Basel, Switzerland. This article is an open access article distributed under the terms and conditions of the Creative Commons Attribution (CC BY) license (<https://creativecommons.org/licenses/by/4.0/>).

|                           | (002)<br>Li-PATH | (002)<br>O <sub>2</sub> -PATH | (121)<br>Li-PATH | (121)<br>O <sub>2</sub> -PATH |
|---------------------------|------------------|-------------------------------|------------------|-------------------------------|
| <b>U<sub>DC</sub>(V)</b>  | 0.91             | 1.48                          | 1.32             | 1.51                          |
| <b>U<sub>0</sub>(V)</b>   | 4.52             | 4.52                          | 3.79             | 3.79                          |
| <b>U<sub>C</sub>(V)</b>   | 5.72             | 11.06                         | 4.62             | 5.48                          |
| <b>η<sub>ORR</sub>(V)</b> | 3.61             | 3.04                          | 2.47             | 2.28                          |
| <b>η<sub>OER</sub>(V)</b> | 1.20             | 6.54                          | 0.83             | 1.69                          |
| <b>η<sub>TOT</sub>(V)</b> | 4.81             | 9.58                          | 3.30             | 3.97                          |

**Table S2.** Adsorption energy ( $E_{\text{ads}}$ ) between different adsorbates and surface of  $\text{Fe}_3\text{C}$ .

| $E_{\text{ads}}(\text{eV})$        | (002)    | (121)    |
|------------------------------------|----------|----------|
| <b>Li</b>                          | -0.90897 | -1.32169 |
| <b>O<sub>2</sub></b>               | 3.49652  | -2.27596 |
| <b>LiO<sub>2</sub></b>             | -7.09868 | -7.29455 |
| <b>Li<sub>2</sub>O<sub>2</sub></b> | -7.06259 | -7.29278 |

**Disclaimer/Publisher's Note:** The statements, opinions and data contained in all publications are solely those of the individual author(s) and contributor(s) and not of MDPI and/or the editor(s). MDPI and/or the editor(s) disclaim responsibility for any injury to people or property resulting from any ideas, methods, instructions or products referred to in the content.
